# Supplementary material
Source: PubMed Central journal article supplement (PMC6857457)
Supplement: NIHMS1058668-supplement-Supplement.pdf [file NIHMS1058668-supplement-Supplement.pdf]

**Supplementary Table 1** The list of metabolites measured by the LC-MS/MS based targeted metabolomics platform.

| In-house ID | Metabolite name                           | Linear calibration curve range (µmol/L) |
|-------------|-------------------------------------------|-----------------------------------------|
| M001        | M001_Tryptophan                           | 0.01 - 10                               |
| M002        | M002_L-kynurenine                         | 0.01 - 10                               |
| M003        | M003_Serotonin                            | 0.01 - 5                                |
| M004        | M004_5-Hydroxyindoleacetic acid (5'-HIAA) | 0.01 - 10                               |
| M005        | M005_Kynurenic acid                       | 0.01 - 1                                |
| M007        | M007_cis-Aconitic acid                    | 0.02 - 2                                |
| M008        | M008_Succinic acid                        | 0.5 - 5                                 |
| M009        | M009_Fumaric acid                         | 0.5 - 10                                |
| M010        | M010_Isocitric acid                       | 0.1 - 5                                 |
| M012        | M012_L-malic acid                         | 0.02 - 5                                |
| M013        | M013_Succinyl coA                         | 0.01 - 10                               |
| M015        | M015_Acetyl coA                           | 0.01 - 10                               |
| M016        | M016_Oxoglutaric acid                     | 0.1 - 10                                |
| M019        | M019_Fructose 6-phosphate                 | 0.01 - 2                                |
| M020        | M020_Fructose 1,6-bisphosphate            | 0.02 - 0.5                              |
| M021        | M021_2-Phosphoglyceric acid               | 0.01 - 10                               |
| M022        | M022_Phosphoenolpyruvic acid              | 0.2 - 10                                |
| M023        | M023_LValine                              | 0.01 - 2                                |
| M024        | M024_Leucine                              | 0.01 - 1                                |
| M025        | M025_Histidine                            | 0.01 - 1                                |
| M026        | M026_Phenylalanine                        | 0.01 - 10                               |
| M027        | M027_Glutamine                            | 0.02 - 10                               |
| M028        | M028_Tyrosine                             | 0.01 - 10                               |
| M029        | M029_Isoleucine                           | 0.1 - 10                                |
| M030        | M030_Threonine                            | 0.05 - 1                                |
| M031        | M031_Glutamic acid                        | 0.02 - 2                                |
| M032        | M032_Arginine                             | 0.01 - 0.5                              |
| M033        | M033_Lysine                               | 0.02 - 0.5                              |
| M034        | M034_S-Adenosylmethionine                 | 0.02 - 2                                |
| M035        | M035_Dihydroxyacetone phosphate           | 0.05 - 1                                |
| M036        | M036_Picolinic acid                       | 0.01 - 10                               |
| M038        | M038_Palmitic acid                        | 0.5 - 5                                 |
| M039        | M039_NADP                                 | 0.02 - 10                               |
| M041        | M041_NAD                                  | 0.01 - 1                                |
| M043        | M043_Dephospho-CoA                        | 0.05 - 10                               |
| M046        | M046_3-Hydroxy-3-methylglutaryl-CoA       | 0.01 - 10                               |
| M047        | M047_Nicotinamide                         | 0.01 - 10/5                             |
| M048        | M048_AICA ribonucleotide                  | 0.01 - 5                                |
| M049        | M049_S-Adenosylhomocysteine               | 0.01 - 10                               |
| M050        | M050_Deoxyribose 5-phosphate              | 0.01 - 2                                |
| M051        | M051_Glucose 1-phosphate                  | 0.01 - 2/0.5                            |
| M052        | M052_dUMP                                 | 0.01 - 5                                |
| M054        | M054_Hypoxanthine                         | 0.01 - 2                                |
| M055        | M055_D-ribose 5-phosphate                 | 0.01 - 2                                |
| M056        | M056_Glutathione                          | 0.01 - 10                               |
| M057        | M057_Gluconic acid                        | 0.01 - 2                                |
| M058        | M058_Uric acid                            | 0.01 - 2                                |
| M062        | M062_1-Methylhistidine                    | 0.01 - 1                                |
| M063        | M063_1-Methylnicotinamide                 | 0.01 - 2                                |
| M064        | M064_2,5-DHBA                             | 0.2 - 10                                |

|      |                                   |                     |
|------|-----------------------------------|---------------------|
| M065 | M065_Deoxycytidine                | 0.01 - 2            |
| M068 | M068_2-ketohexanoic acid          | 0.05 - 5            |
| M069 | M069_5-Methoxytryptophan          | 0.01 - 10           |
| M070 | M070_L-Acetylcarnitine            | 0.01 - 10           |
| M071 | M071_N-Alpha-acetyllysine         | 0.01 - 2            |
| M073 | M073_adenosine                    | 0.01 - 1            |
| M074 | M074_Adenosine diphosphate ribose | 0.01 - 10/2         |
| M075 | M075_ADP                          | 0.01 - 2            |
| M076 | M076_Agmatine                     | 0.02 -0.5           |
| M077 | M077_Aminoadipic acid             | 0.05 - 2            |
| M078 | M078_aminolevulinic acid          | 0.1 - 10            |
| M079 | M079_AMP                          | 0.01 - 10           |
| M080 | M080_Biotin                       | 0.01 - 10           |
| M082 | M082_Butyrylcholine               | 0.01 - 1            |
| M083 | M083_Carnitine                    | 0.01 - 10/2         |
| M084 | M084_Chlorzoxazone                | 0.5 - 10            |
| M085 | M085_Citraconic acid              | 0.1 - 10            |
| M086 | M086_Citrulline                   | 0.01 - 10           |
| M087 | M087_CMP                          | 0.01 - 10           |
| M089 | M089_Cytosine                     | 0.01 - 0.5          |
| M090 | M090_dAMP                         | 0.01 - 10           |
| M091 | M091_Dehydroascorbic acid         | 0.5 - 5             |
| M092 | M092_Deoxyinosine                 | 0.1 - 2             |
| M093 | M093_Deoxyuridine                 | 0.1 - 10            |
| M096 | M096_2-Aminooctanoic acid         | 0.01 - 10           |
| M097 | M097_D-Glyceraldehyde 3-phosphate | 0.05 - 2            |
| M099 | M099_FAD                          | 0.01 - 10           |
| M100 | M100_Flavone                      | 0.01 - 10           |
| M101 | M101_Folic acid                   | 0.01 - 5/2          |
| M103 | M103_Gluconic acid                | 0.05 - 1            |
| M105 | M105_Glucosamine                  | 0.02 - 2            |
| M106 | M106_Glucose 6-phosphate          | 0.01 - 2            |
| M107 | M107_Glucuronic acid              | 0.01 - 2            |
| M108 | M108_Glycerate                    | 0.5 - 10            |
| M109 | M109_GMP                          | 0.02 - 2 / 0.05 -10 |
| M112 | M112_Guanidoacetic acid           | 0.05 - 5            |
| M113 | M113_Guanine                      | 0.01 - 10           |
| M114 | M114_Guanosine                    | 0.01 - 10           |
| M117 | M117_Homoserine                   | 0.01 - 5            |
| M118 | M118_Hydroxyisocaproic acid       | 0.01 - 10           |
| M119 | M119_Hydroxyphenylacetic acid     | 0.2 - 10            |
| M121 | M121_Imidazole                    | 0.02 - 2            |
| M122 | M122_Imidazoleacetic acid         | 0.01 - 2            |
| M123 | M123_IMP                          | 0.02 - 1            |
| M124 | M124_Indole                       | 0.1 - 10            |
| M125 | M125_Indole-3-carboxylic acid     | 0.01 - 10           |
| M126 | M126_Indoleacrylic acid           | 0.01 - 10           |
| M127 | M127_lipoate                      | 0.2 - 5             |
| M128 | M128_L-Pipecolic acid             | 0.02 - 5            |
| M129 | M129_Methionine sulfoxide         | 0.01 - 10           |
| M131 | M131_N-Acetyl-L-aspartic acid     | 0.01 - 2 / 0.02 - 1 |
| M132 | M132_N-Acetyl-D-glucosamine       | 0.01 - 1            |
| M133 | M133_N-Acetyl-L-alanine           | 0.02 - 10           |
| M134 | M134_N-acetylorcarnitine          | 0.01 - 5/2          |

|      |                                              |                     |
|------|----------------------------------------------|---------------------|
| M137 | M137_Nicotinic acid                          | 0.01 - 5/2          |
| M138 | M138_N-Methyl-D-aspartic acid                | 0.01 - 2 / 0.05 - 1 |
| M139 | M139_O-Acetyl-L-serine                       | 0.1 - 2             |
| M140 | M140_Ornithine                               | 0.01 - 0.5          |
| M141 | M141_Orotate                                 | 0.02 - 5            |
| M142 | M142_Oxaloacetate                            | 0.02 - 10           |
| M143 | M143_Pantothenic acid                        | 0.01 - 10           |
| M144 | M144_Perfluoroheptanoic acid                 | 0.01 - 5            |
| M145 | M145_Phenyllactic acid                       | 0.05 - 10           |
| M146 | M146_Phenylpropionic acid                    | 0.05 - 10           |
| M147 | M147_Phenylpyruvate                          | 0.1 - 10            |
| M149 | M149_4-Hydroxybenzoic acid                   | 0.05 - 10           |
| M150 | M150_L-Proline                               | 0.05 - 2            |
| M151 | M151_Purine                                  | 0.01 - 10           |
| M152 | M152_Pyridoxal 5'-phosphate                  | 0.01 - 5            |
| M153 | M153_Pyridoxamine                            | 0.01 - 0.5          |
| M154 | M154_Pyridoxine                              | 0.01 - 1            |
| M155 | M155_Pyroglutamic acid                       | 0.1 - 2             |
| M157 | M157_Flavin Mononucleotide                   | 0.2 - 10            |
| M158 | M158_Shikimic acid                           | 0.05 - 5            |
| M160 | M160_Sorbitol                                | 0.1 - 5             |
| M161 | M161_Taurine                                 | 0.02 - 10           |
| M162 | M162_Thiamine                                | 0.01 - 10           |
| M163 | M163_Thymidine                               | 0.01 - 2/1          |
| M164 | M164_Thymine                                 | 0.01 - 10/5         |
| M166 | M166_Uridine diphosphate-N-acetylglucosamine | 0.01 - 10           |
| M167 | M167_Uridine 5'-monophosphate                | 0.01 - 2            |
| M168 | M168_Uracil                                  | 0.01 - 10           |
| M169 | M169_Uridine                                 | 0.01 - 2            |
| M170 | M170_Xanthine                                | 0.01 - 5            |
| M171 | M171_Xanthosine                              | 0.01 - 5            |
| M172 | M172_Xanthylic acid                          | 0.05 - 5            |
| M173 | M173_Xanthurenic acid                        | 0.01 - 2            |
| M174 | M174_Adenosine triphosphate                  | 0.05 - 5            |
| M175 | M175_Cytidine triphosphate                   | 0.5 - 10            |
| M176 | M176_Guanosine triphosphate                  | 0.05 - 5            |
| M177 | M177_Uridine triphosphate                    | 0.02 - 5            |
| M178 | M178_dATP                                    | 0.01 - 10           |
| M179 | M179_dCTP                                    | 0.01 - 10           |
| M180 | M180_dGTP                                    | 0.05 - 2            |
| M181 | M181_dTTP                                    | 0.01 - 5            |
| M182 | M182_L-Cysteine                              | 0.02/0.1 - 1        |
| M183 | M183_L-Alanine                               | 0.5 - 10            |
| M184 | M184_L-Asparagine                            | 0.1 - 10            |
| M185 | M185_Glycine                                 | 0.5 - 10            |
| M186 | M186_L-Aspartic acid                         | 0.01 - 1            |
| M187 | M187_Argininosuccinic acid                   | 0.01 - 2            |
| M188 | M188_Sarcosine                               | 0.2 - 10            |
| M190 | M190_Betaine                                 | 0.05 - 5            |
| M191 | M191_Choline                                 | 0.01 - 1            |
| M192 | M192_Cystathionine                           | 0.01 - 1            |
| M194 | M194_Urea                                    | 0.02 - 1            |
| M195 | M195_Cytidine                                | 0.01 - 2            |
| M196 | M196_CDP                                     | 0.01 - 5            |

|      |                                         |             |
|------|-----------------------------------------|-------------|
| M197 | M197_GDP                                | 0.02 - 10   |
| M198 | M198_UDP                                | 0.01 - 10   |
| M200 | M200_dCMP                               | 0.01 - 2    |
| M201 | M201_dCDP                               | 0.01 - 10   |
| M202 | M202_dGMP                               | 0.05 - 10   |
| M203 | M203_dGDP                               | 0.05 - 10   |
| M204 | M204_dTMP                               | 0.01 - 5    |
| M205 | M205_dTDP                               | 0.01 - 10   |
| M206 | M206_UDP- glucose                       | 0.01 - 2    |
| M207 | M207_ADP-glucose                        | 0.01 - 1    |
| M211 | M211_Maleic acid                        | 0.1 - 10    |
| M214 | M214_Methylmalonic acid                 | 0.1 - 2     |
| M216 | M216_2-Aminobenzoic acid                | 0.01 - 10   |
| M217 | M217_p-Aminobenzoic acid                | 0.01 - 10/5 |
| M219 | M219_2-Oxo-4-methylthiobutanoic acid    | 0.02 - 10   |
| M220 | M220_2-Pyrocatechuic acid               | 0.01 - 10   |
| M221 | M221_L-Dihydroorotic acid               | 0.01 - 2    |
| M224 | M224_4-Pyridoxic acid                   | 0.01 - 1    |
| M225 | M225_2-keto-D-gluconic acid             | 0.01 - 2    |
| M226 | M226_D-Erythrose 4-phosphate            | 0.01 - 2    |
| M227 | M227_D-Glucaric acid                    | 0.05 - 2    |
| M228 | M228_Inosine                            | 0.01 - 2    |
| M229 | M229_D-Sedoheptulose 7-phosphate        | 0.01 - 2/1  |
| M230 | M230_N-Acetyl-glucosamine-1-phosphate   | 0.01 - 2    |
| M231 | M231_Cyclic AMP                         | 0.01 - 10   |
| M232 | M232_Sucrose                            | 0.01 - 5    |
| M238 | M238_Thiamine pyrophosphate             | 0.05 - 10   |
| M239 | M239_Adenosine phosphosulfate           | 0.01 - 10   |
| M241 | M241_Cholesterol sulfate                | 0.01 - 10   |
| M242 | M242_Citicoline                         | 0.01 - 10   |
| M243 | M243_Taurodeoxycholic acid              | 0.01 - 2    |
| M245 | M245_Coenzyme A                         | 0.1 - 10    |
| M246 | M246_Propionyl-CoA                      | 0.01 - 10   |
| M247 | M247_3-Hydroxybutyryl-CoA               | 0.01 - 5    |
| M248 | M248_L-2-Hydroxyglutaric acid           | 0.01 - 2    |
| M249 | M249_Ethanlamine                        | 0.01 - 1    |
| M251 | M251_Gamma-Aminobutyric acid            | 0.01 - 2    |
| M254 | M254_Creatinine                         | 0.01 - 1    |
| M255 | M255_Creatine                           | 0.01 - 1    |
| M256 | M256_N-Acetylputrescine                 | 0.01 - 1    |
| M257 | M257_4-Hydroxyproline                   | 0.02 - 5    |
| M258 | M258_Adenine                            | 0.02 - 10   |
| M259 | M259_L-Homocysteine                     | 0.05 - 2    |
| M260 | M260_L-Histidinol                       | 0.01 - 1    |
| M262 | M262_Phosphorylcholine                  | 0.02 - 1    |
| M263 | M263_Phosphoserine                      | 0.5 - 10    |
| M264 | M264_N-Acetylglutamine                  | 0.01 - 2    |
| M265 | M265_N-Acetylglutamic acid              | 0.01 - 5    |
| M266 | M266_Asymmetric dimethylarginine        | 0.01 - 2    |
| M267 | M267_L-Cystine                          | 0.02 - 1    |
| M268 | M268_Deoxyadenosine                     | 0.01 - 1    |
| M269 | M269_AICA-riboside                      | 0.01 - 10   |
| M271 | M271_7-Methylguanosine                  | 0.01 - 1    |
| M272 | M272_Beta-nicotinamide D-ribonucleotide | 0.01 - 5    |

|      |                                         |            |
|------|-----------------------------------------|------------|
| M273 | M273_Riboflavin                         | 0.01 - 10  |
| M276 | M276_3,5-Diiodothyronine                | 0.01 - 2   |
| M277 | M277_Putrescine                         | 0.01 - 0.5 |
| M278 | M278_Spermidine                         | 0.01 - 0.5 |
| M279 | M279_Spermine                           | 0.01 - 1   |
| M280 | M280_Acetone                            | 0.2 - 10   |
| M281 | M281_Alpha-Hydroxyisobutyric acid       | 0.01 -10   |
| M282 | M282_p-Hydroxyphenylacetic acid         | 0.01 -10   |
| M289 | M289_Dimethylamine                      | 0.05 - 2   |
| M290 | M290_Glycocholic acid                   | 0.01 - 10  |
| M293 | M293_Hippurate                          | 0.01 - 10  |
| M298 | M298_Stigmasterol                       | 0.01 - 10  |
| M299 | M299-Taurochenodesoxycholic acid        | 0.01 - 10  |
| M300 | M300_Taurocholic acid                   | 0.01 - 10  |
| M302 | M302_Lithocholytaurine                  | 0.01 - 10  |
| M303 | M303_Ursodeoxycholic acid               | 0.01 - 10  |
| M304 | M304_Campesterol                        | 0.01 - 5   |
| M305 | M305_3-Phosphoglyceric acid             | 0.01 - 10  |
| M306 | M306_Thiamine monophosphate             | 0.01 - 10  |
| M307 | M307_Deoxyguanosine                     | 0.01 - 10  |
| M308 | M308_Malonyl CoA                        | 0.05 - 1   |
| M309 | M309_D-Phenyllactic acid                | 0.2 - 10   |
| M310 | M310_Citramalic acid                    | 0.01 - 2   |
| M311 | M311_L-Homocysteic acid                 | 0.01 - 2   |
| M312 | M312_Serine                             | 0.02 - 10  |
| M314 | M314_CDP-ethanolamine                   | 0.01 - 10  |
| M315 | M315_p-Cresyl sulfate                   | 0.01 - 10  |
| M316 | M316_Lithocholic acid glycine conjugate | 0.01 - 10  |
| M317 | M317_Dihydrothymine                     | 0.01 - 0.2 |
| M318 | M318_ Alpha-N-Phenylacetyl-L-glutamine  | 0.01 - 10  |
| M319 | M319_ Phenylacetyl glycine              | 0.01 - 10  |
| M327 | M327_Lithocholic acid                   | 0.01 -10   |
| M328 | M328_ Linoleyl Carnitine                | 0.01 -10   |
| M329 | M329_ Valerylcarnitine                  | 0.01 -10   |
| M330 | M330_ Dodecanoylcarnitine               | 0.01 -10   |
| M331 | M331_ L-Palmitoylcarnitine              | 0.01 -10   |
| M341 | M341_ Tetradecanoylcarnitine            | 0.01 - 5   |
| M342 | M342_ Propionylcarnitine                | 0.01 - 10  |
| M343 | M343_ L-Octanoylcarnitine               | 0.01 - 10  |
| M344 | M344_ Decanoylcarnitine                 | 0.01 - 5   |
| M345 | M345_ Malonyl carnitine                 | 0.01 - 5   |
| M346 | M346_ Stearoylcarnitine                 | 0.01 - 5   |

---

\* Calibration standards are prepared in mass spectrometry grade water.

**Supplementary Table 2** Significantly changed metabolites<sup>a</sup> following 1.5-h intravenous infusion of irinotecan alone (on Cycle 1 Day 1)

| Name                        | p-value  | FDR   | Pairwise Fisher's LSD post-hoc test |     |     |     |     |     |     |     |     |     |   |
|-----------------------------|----------|-------|-------------------------------------|-----|-----|-----|-----|-----|-----|-----|-----|-----|---|
|                             |          |       | 1-2                                 | 1-3 | 1-4 | 1-5 | 2-3 | 2-4 | 2-5 | 3-4 | 3-5 | 4-5 |   |
| N- $\alpha$ -acetyllysine   | 2.91E-05 | 0.004 | ■                                   |     |     |     | ■   | ■   |     |     |     | ■   | ■ |
| Aminoadipic acid            | 3.29E-04 | 0.021 |                                     | ■   |     |     |     | ■   | ■   |     |     | ■   | ■ |
| Asymmetric dimethylarginine | 4.73E-04 | 0.021 | ■                                   |     |     |     |     |     |     |     |     |     |   |
| Thymine                     | 9.09E-04 | 0.030 | ■                                   |     |     |     |     |     |     |     |     |     |   |
| Propionyl-L-carnitine       | 0.002    | 0.060 |                                     |     | ■   |     |     | ■   | ■   |     |     | ■   | ■ |
| N-Acetylglutamic acid       | 0.003    | 0.063 |                                     | ■   |     |     |     | ■   | ■   |     |     | ■   | ■ |
| L-Acetylcarnitine           | 0.004    | 0.063 | ■                                   |     |     |     |     | ■   | ■   |     |     | ■   | ■ |
| Malonyl-L-carnitine         | 0.004    | 0.063 | ■                                   |     |     |     |     | ■   | ■   |     |     | ■   | ■ |
| Cystathionine               | 0.005    | 0.063 |                                     |     | ■   |     |     | ■   | ■   |     |     | ■   | ■ |
| Sorbitol                    | 0.005    | 0.063 | ■                                   |     |     |     |     | ■   | ■   |     |     | ■   | ■ |
| Creatine                    | 0.005    | 0.063 |                                     |     | ■   |     |     | ■   | ■   |     |     | ■   | ■ |
| L-Alanine                   | 0.006    | 0.063 | ■                                   |     |     |     |     | ■   | ■   |     |     | ■   | ■ |
| Uracil                      | 0.006    | 0.065 |                                     |     |     |     |     | ■   | ■   |     |     | ■   | ■ |
| Phenylalanine               | 0.010    | 0.098 |                                     |     | ■   |     |     | ■   | ■   |     |     | ■   | ■ |
| D-Tryptophan                | 0.012    | 0.104 |                                     |     | ■   |     |     | ■   | ■   |     |     | ■   | ■ |
| Imidazoleacetic acid        | 0.017    | 0.140 |                                     | ■   |     |     |     | ■   | ■   |     |     | ■   | ■ |
| Arginine                    | 0.019    | 0.142 |                                     |     | ■   |     |     | ■   | ■   |     |     | ■   | ■ |
| Xanthine                    | 0.020    | 0.142 |                                     | ■   |     |     |     | ■   | ■   |     |     | ■   | ■ |
| Valeryl-L-carnitine         | 0.020    | 0.142 |                                     |     |     |     |     | ■   | ■   |     |     | ■   | ■ |
| Pantothenic acid            | 0.023    | 0.149 | ■                                   |     |     |     |     | ■   | ■   |     |     | ■   | ■ |
| Dimethylglycine Choline     | 0.023    | 0.149 |                                     |     | ■   |     |     | ■   | ■   |     |     | ■   | ■ |
| L-Proline                   | 0.028    | 0.169 |                                     |     | ■   |     |     | ■   | ■   |     |     | ■   | ■ |
| S-Adenosylmethionine        | 0.030    | 0.172 |                                     |     |     |     |     | ■   | ■   |     |     | ■   | ■ |
| Oxoglutaric acid            | 0.032    | 0.180 | ■                                   |     |     |     |     | ■   | ■   |     |     | ■   | ■ |
| 2-Aminooctanoic acid        | 0.036    | 0.184 |                                     |     | ■   |     |     | ■   | ■   |     |     | ■   | ■ |
| Uridine                     | 0.036    | 0.184 |                                     |     |     |     |     | ■   | ■   |     |     | ■   | ■ |

<sup>a</sup> One-way analysis of variance (ANOVA), if significant (FDR-adjusted p value < 0.2), followed by Fisher's LSD post-hoc analysis. The significant pairwise Fisher's LSD post-hoc tests at a 5% level are indicated with filled black boxes. Groups 1, 2, 3, 4 and 5 represent plasma samples collected at pre-treatment, 1.5, 5.5, 28, and 48 h following the start of irinotecan infusion.

**Supplementary Table 3** Significantly changed metabolites following 1.5-h intravenous infusion of irinotecan in combination with veliparib (on Cycle 2 Day 8)

| Name                        | p-value  | FDR      | Pairwise Fisher's LSD post-hoc test |     |     |     |     |     |     |     |     |     |  |  |
|-----------------------------|----------|----------|-------------------------------------|-----|-----|-----|-----|-----|-----|-----|-----|-----|--|--|
|                             |          |          | 1-2                                 | 1-3 | 1-4 | 1-5 | 2-3 | 2-4 | 2-5 | 3-4 | 3-5 | 4-5 |  |  |
| N- $\alpha$ -acetyllysine   | 1.89E-08 | 2.46E-06 | ■                                   |     |     |     |     |     |     |     |     |     |  |  |
| Thymine                     | 8.45E-08 | 5.49E-06 | ■                                   |     |     |     |     |     |     |     |     |     |  |  |
| Asymmetric dimethylarginine | 5.23E-05 | 0.002    |                                     | ■   |     |     |     |     |     |     |     |     |  |  |
| Pantothenic acid            | 2.12E-04 | 0.005    |                                     |     |     |     |     |     |     |     |     |     |  |  |
| D-Tryptophan                | 2.05E-04 | 0.005    |                                     |     |     |     |     |     |     |     |     |     |  |  |
| Xanthine                    | 2.01E-04 | 0.005    |                                     |     |     |     |     |     |     |     |     |     |  |  |
| Cystathionine               | 8.09E-04 | 0.015    |                                     |     |     |     |     |     |     |     |     |     |  |  |
| N-Acetylglutamic acid       | 9.91E-04 | 0.016    |                                     |     |     |     |     |     |     |     |     |     |  |  |
| Phenylalanine               | 0.001    | 0.020    |                                     |     |     |     |     |     |     |     |     |     |  |  |
| Aminoadipic acid            | 0.002    | 0.023    |                                     |     |     |     |     |     |     |     |     |     |  |  |
| Ethanolamine                | 0.002    | 0.023    |                                     |     |     |     |     |     |     |     |     |     |  |  |
| L-Proline                   | 0.003    | 0.036    |                                     |     |     |     |     |     |     |     |     |     |  |  |
| Propionyl-L-carnitine       | 0.005    | 0.048    |                                     |     |     |     |     |     |     |     |     |     |  |  |
| 5-Hydroxyindoleacetic-acid  | 0.006    | 0.054    |                                     |     |     |     |     |     |     |     |     |     |  |  |
| Guanosine                   | 0.007    | 0.054    |                                     |     |     |     |     |     |     |     |     |     |  |  |
| Malonyl-L-carnitine         | 0.007    | 0.054    |                                     |     |     |     |     |     |     |     |     |     |  |  |
| Shikimic acid               | 0.007    | 0.054    |                                     |     |     |     |     |     |     |     |     |     |  |  |
| L-Acetylcarnitine           | 0.008    | 0.055    |                                     |     |     |     |     |     |     |     |     |     |  |  |
| L-Malic acid                | 0.012    | 0.080    |                                     |     |     |     |     |     |     |     |     |     |  |  |
| Creatinine                  | 0.013    | 0.082    |                                     |     |     |     |     |     |     |     |     |     |  |  |
| Oxaloacetate                | 0.013    | 0.082    |                                     |     |     |     |     |     |     |     |     |     |  |  |
| Hypoxanthine                | 0.015    | 0.085    |                                     |     |     |     |     |     |     |     |     |     |  |  |
| Carnitine                   | 0.015    | 0.085    |                                     |     |     |     |     |     |     |     |     |     |  |  |
| Inosine                     | 0.024    | 0.128    |                                     |     |     |     |     |     |     |     |     |     |  |  |
| Valeryl-L-carnitine         | 0.026    | 0.133    |                                     |     |     |     |     |     |     |     |     |     |  |  |
| N-Acetyl-L-alanine          | 0.027    | 0.133    |                                     |     |     |     |     |     |     |     |     |     |  |  |
| Dimethylglycine Choline     | 0.028    | 0.133    |                                     |     |     |     |     |     |     |     |     |     |  |  |
| Threonine                   | 0.031    | 0.146    |                                     |     |     |     |     |     |     |     |     |     |  |  |
| Imidazoleacetic acid        | 0.037    | 0.160    |                                     |     |     |     |     |     |     |     |     |     |  |  |
| Sorbitol                    | 0.037    | 0.160    |                                     |     |     |     |     |     |     |     |     |     |  |  |
| Arginine                    | 0.039    | 0.165    |                                     |     |     |     |     |     |     |     |     |     |  |  |
| L-Alanine                   | 0.043    | 0.173    |                                     |     |     |     |     |     |     |     |     |     |  |  |
| Sarcosine                   | 0.047    | 0.183    |                                     |     |     |     |     |     |     |     |     |     |  |  |

<sup>a</sup> One-way analysis of variance (ANOVA), if significant (FDR-adjusted p value < 0.2), followed by Fisher's LSD post-hoc analysis. The significant pairwise Fisher's LSD post-hoc tests at a 5% level are indicated with filled black boxes. Groups 1, 2, 3, 4 and 5 represent plasma samples collected at pre-treatment, 1.5, 5.5, 28, and 48 h following the start of irinotecan infusion.
